# Supplementary material for: Estimating parent-specific QTL effects through cumulating linked identity-by-state SNP effects in multiparental populations
Source: PubMed Central journal article supplement — Heredity (Edinb). 2016 Dec 14;118(5):477–85. doi: 10.1038/hdy.2016.121 (PMC5520528; doi:10.1038/hdy.2016.121), 2016-12-14

**Figure S3) Graphs depicting all significant marker effects obtained from model 'IBS-M' in the major QTL regions of HEB-25.**

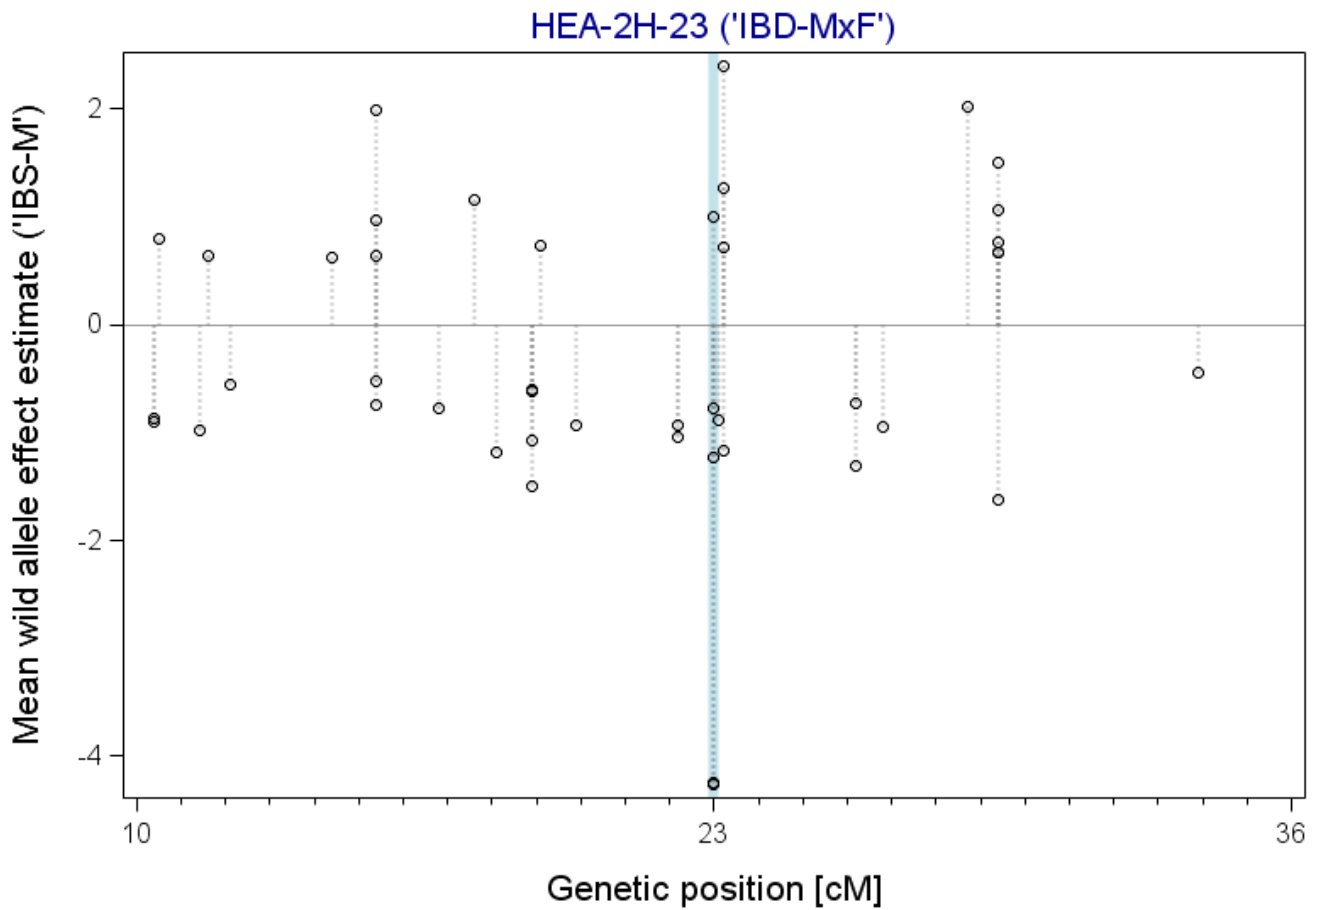

The presented interval spans 26 cM within the QTL position detected by model 'IBD-MxF' (indicated by a light blue background) in its centre. Each dot represents the mean wild effect estimate of a marker detected in 100 cross-validation runs of model 'IBS-M'. Those effects were first multiplied by the parental marker genotypes. Then, the obtained products were summed up to obtain parent-specific effects of the respective QTL (so-called cumulation method).

HEA-2H-57 ('IBD-MxF')

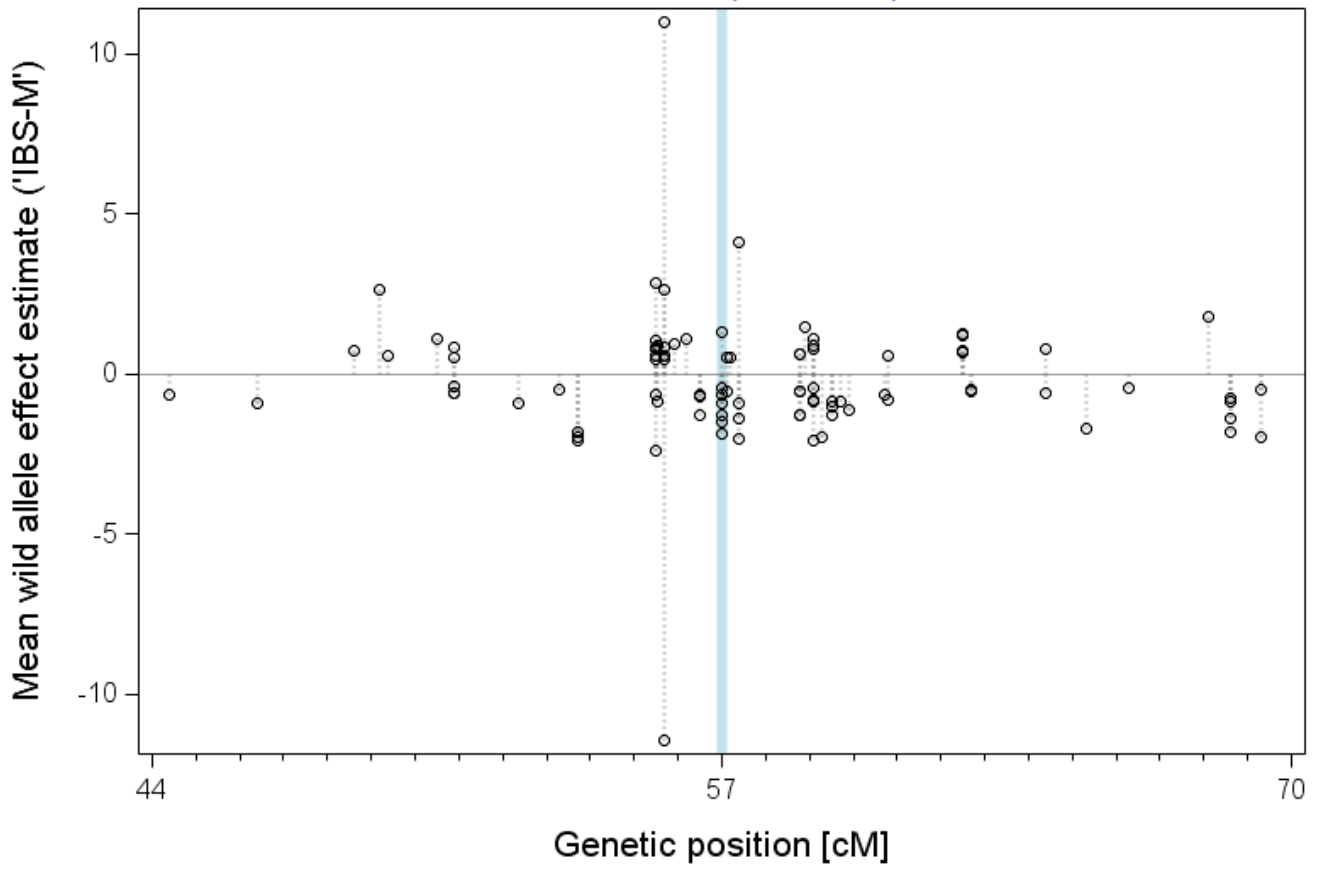

HEA-3H-107.8 ('IBD-MxF')

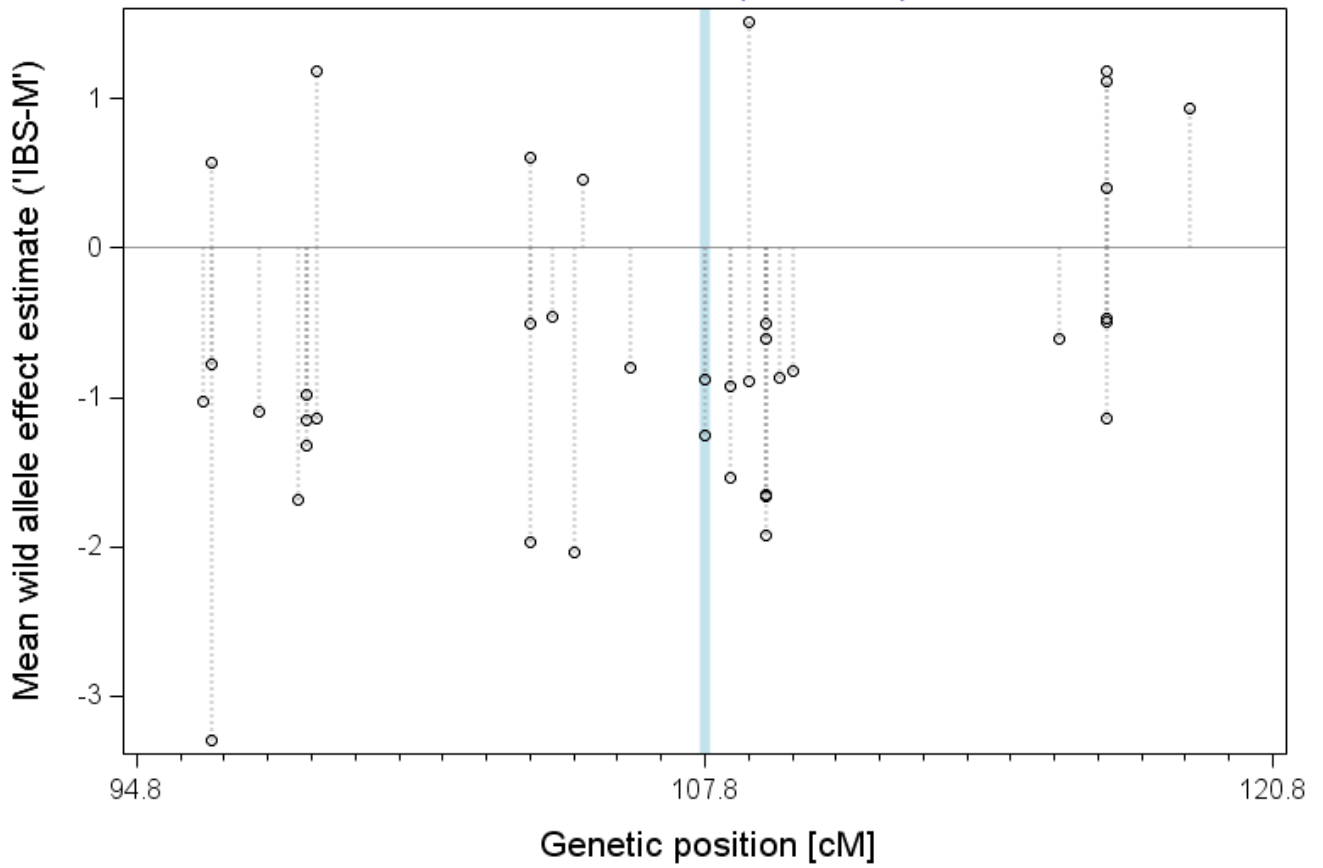

HEA-4H-3.5 ('IBD-MxF')

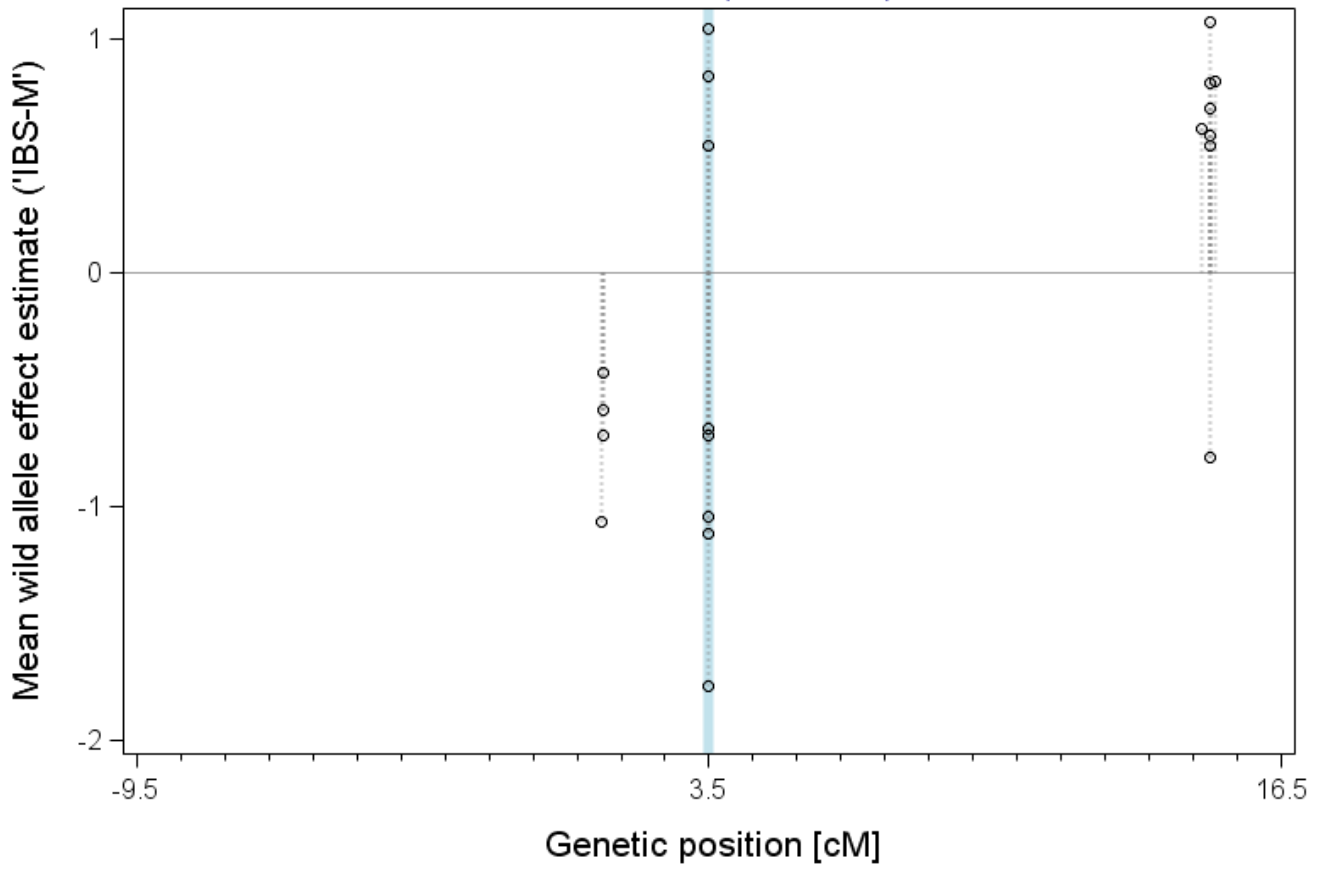

HEA-4H-113.4 ('IBD-MxF')

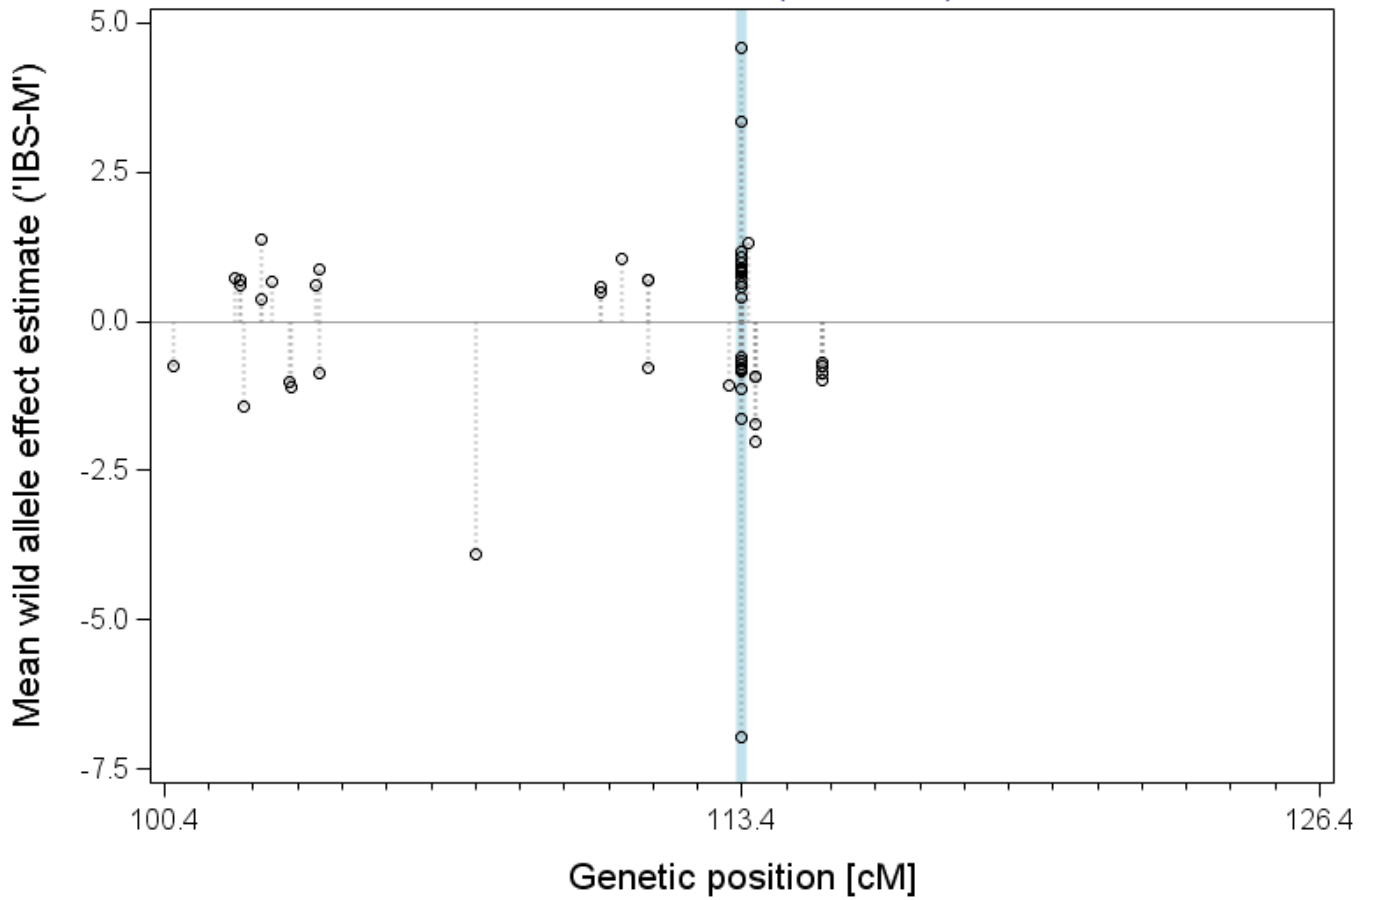

HEA-5H-125.5 ('IBD-MxF')

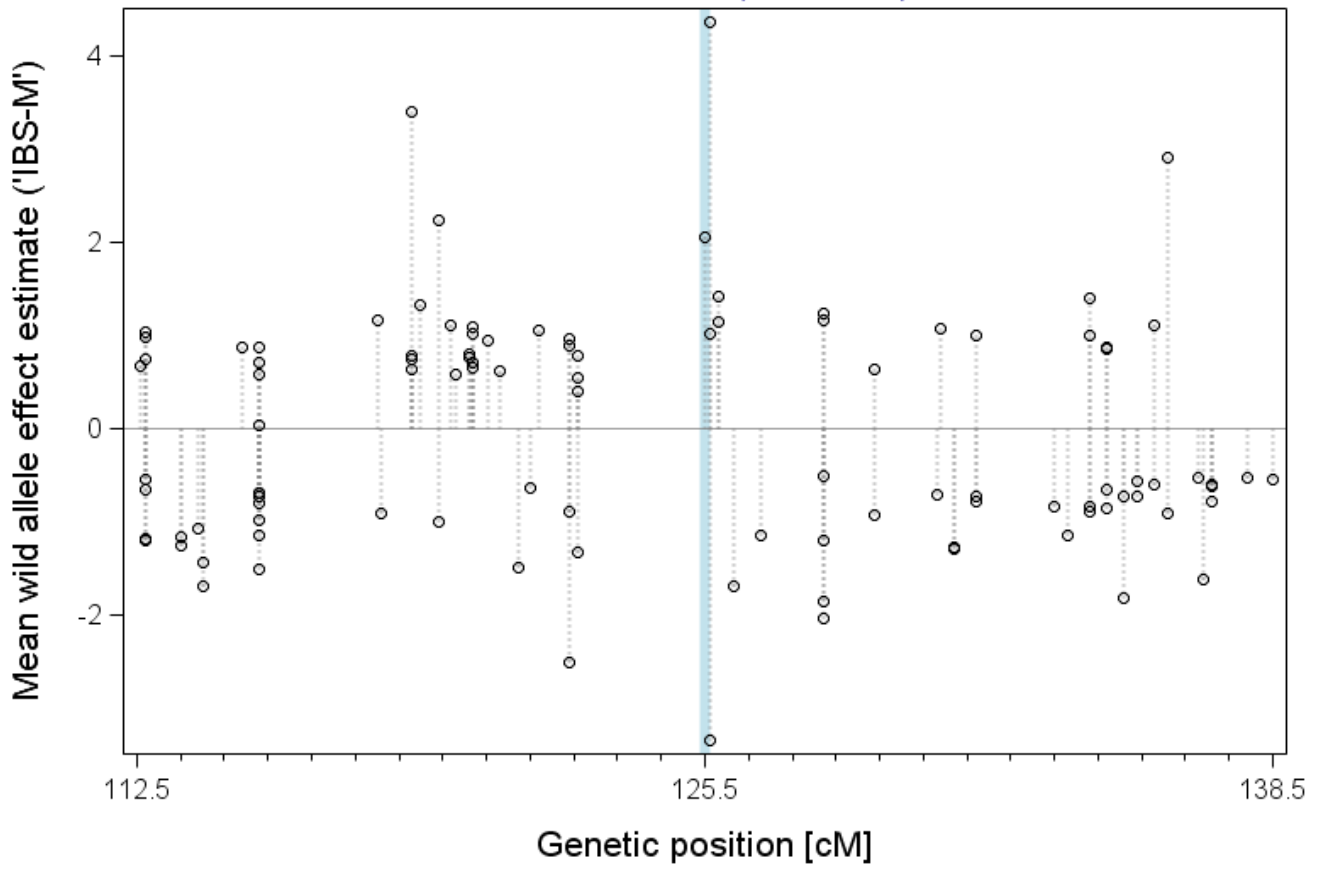

HEA-7H-34.3 ('IBD-MxF')

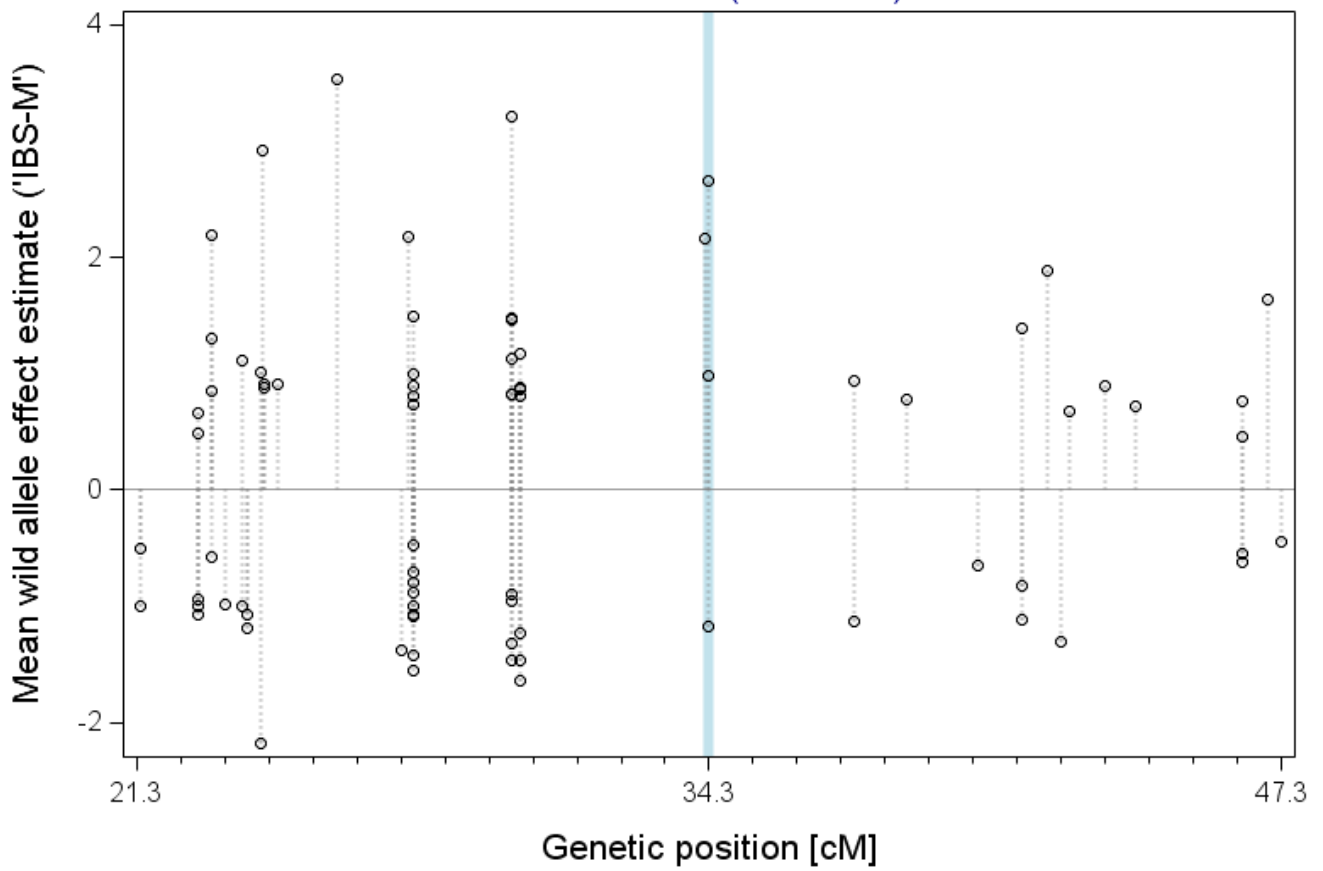

TGW-4H-14.9 ('IBD-MxF')

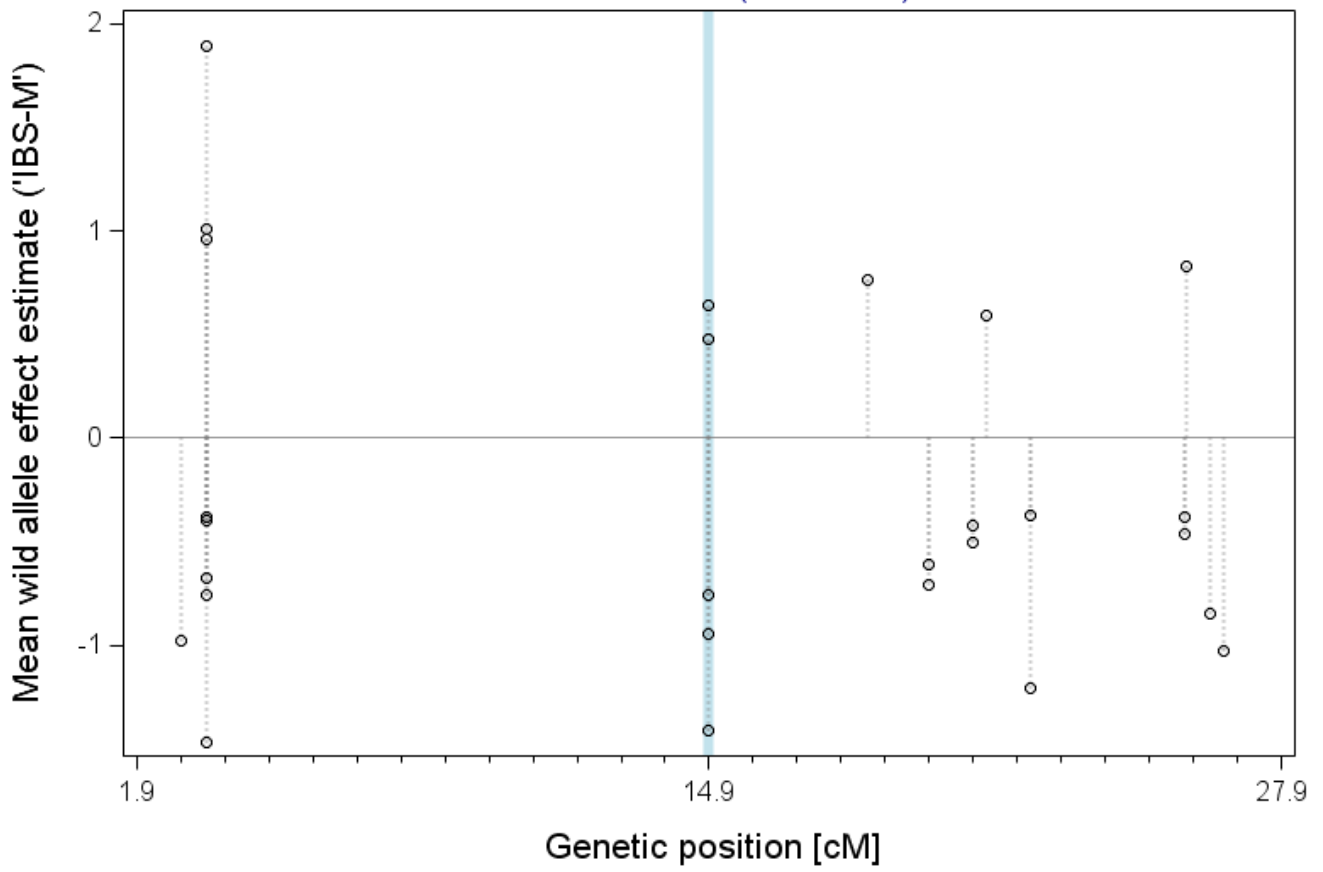

TGW-6H-49.1 ('IBD-MxF')

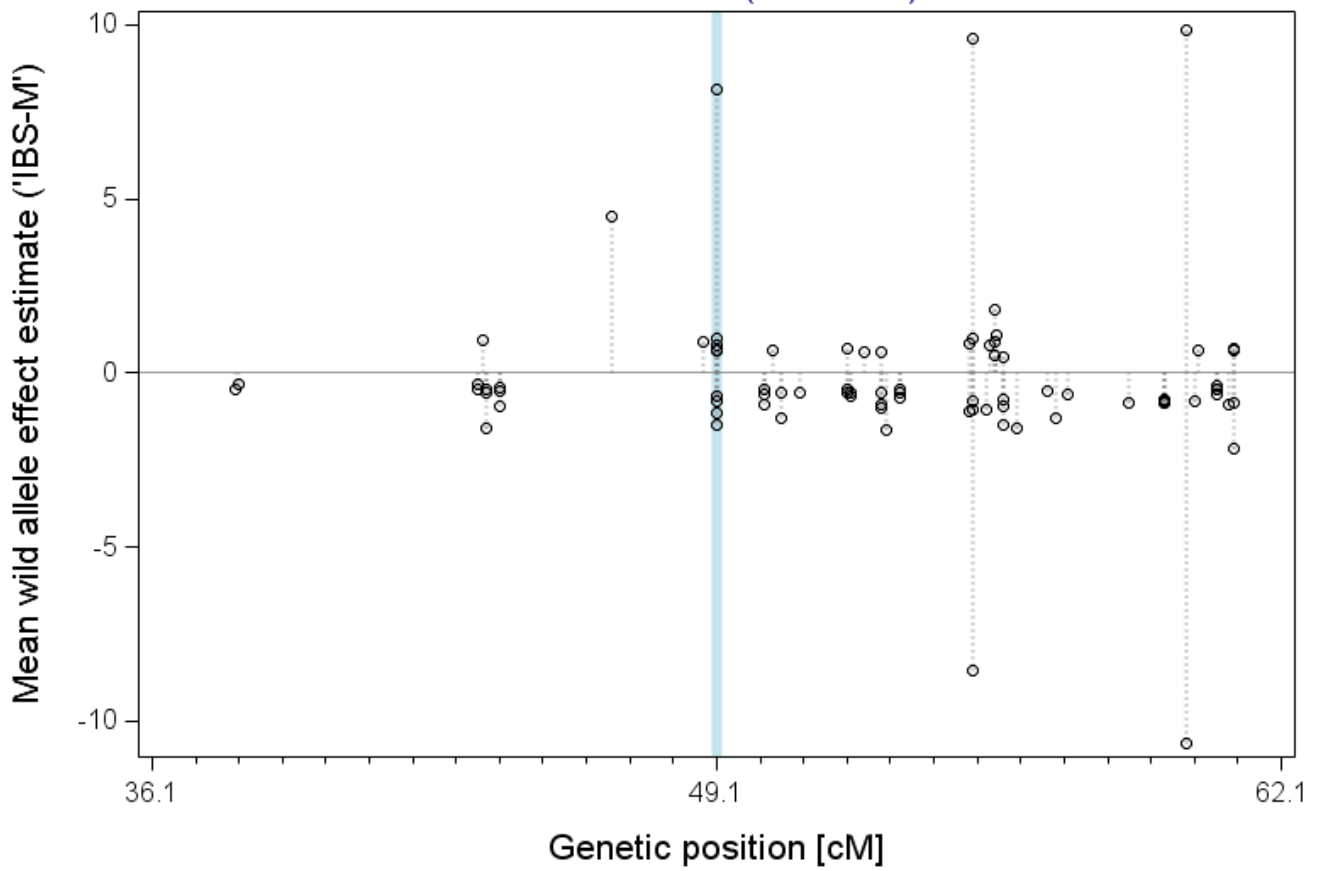

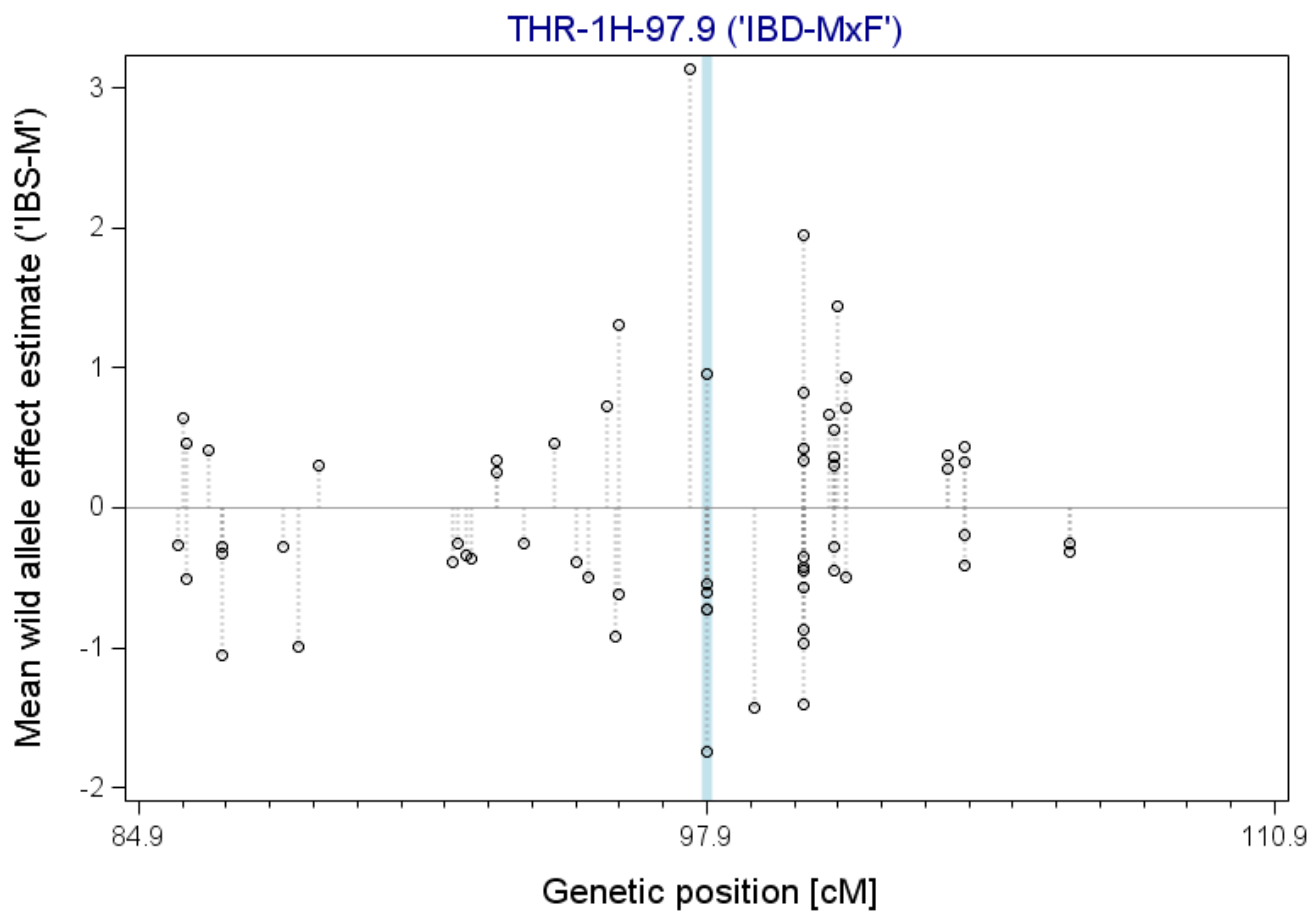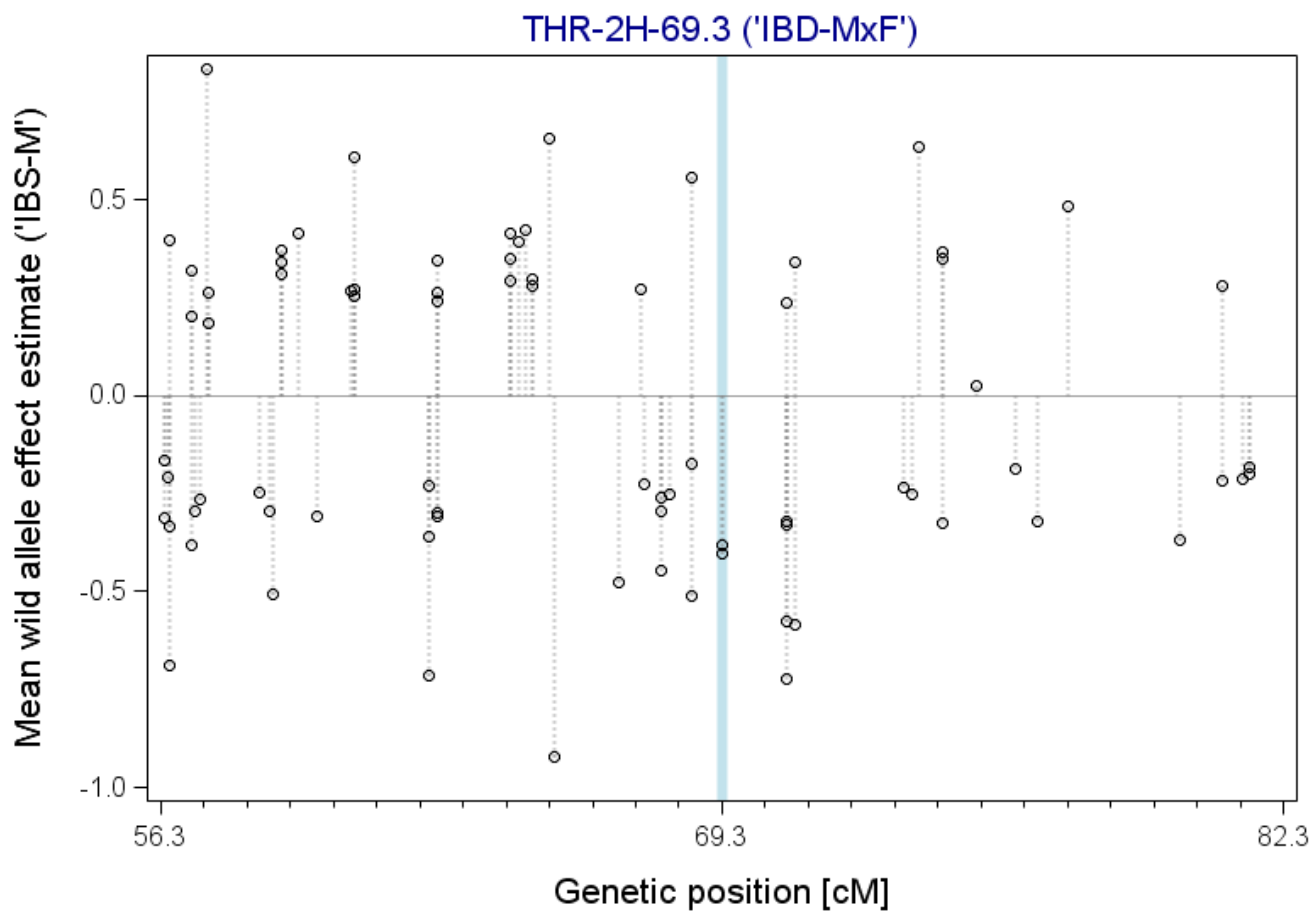

GrCol-1H-116.8 ('IBD-MxF')

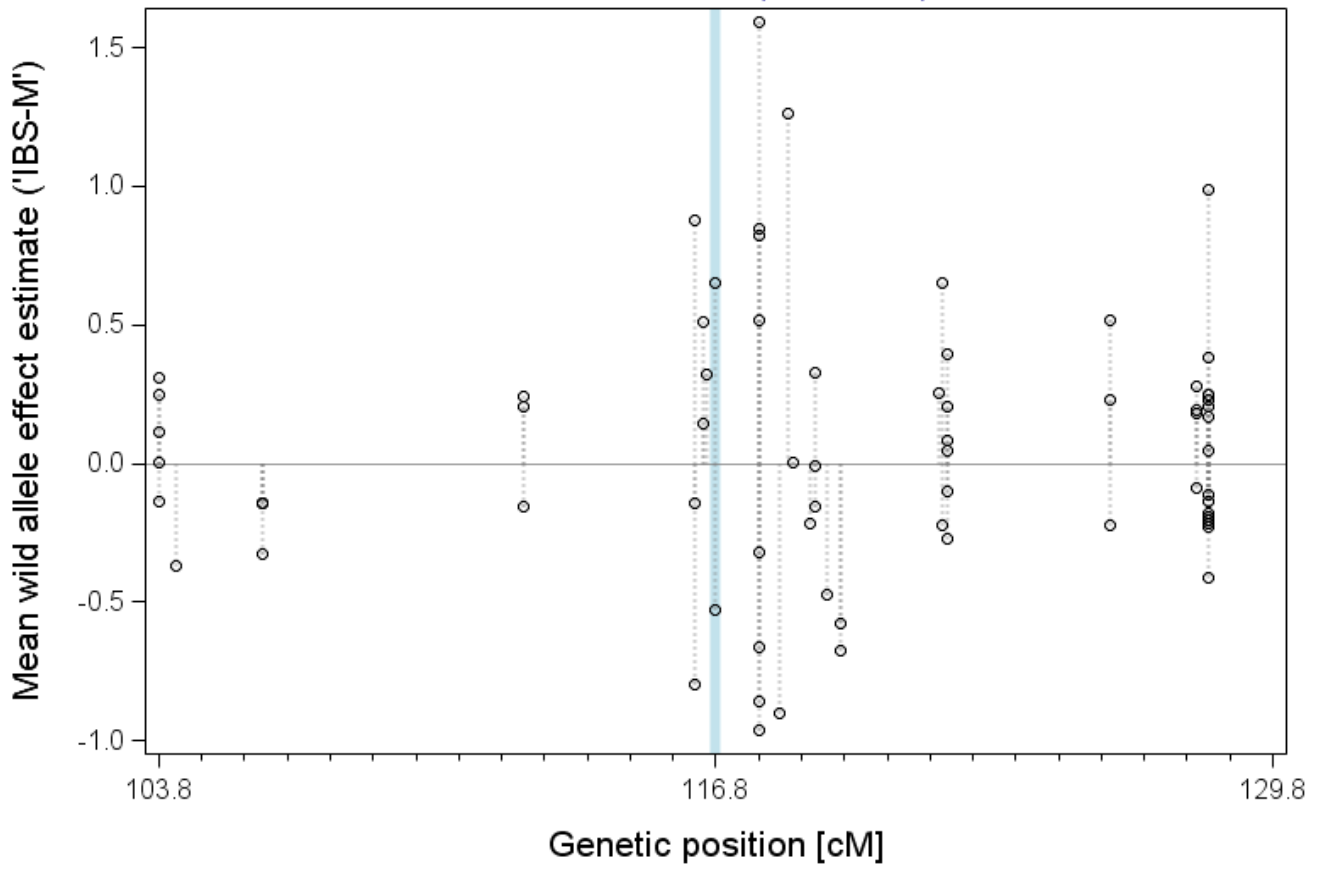

Supplement: hdy2016121x4.pdf [file hdy2016121x4.pdf]
