# Supplementary material for: Estimating parent-specific QTL effects through cumulating linked identity-by-state SNP effects in multiparental populations
Source: PubMed Central journal article supplement — Heredity (Edinb). 2016 Dec 14;118(5):477–85. doi: 10.1038/hdy.2016.121 (PMC5520528; doi:10.1038/hdy.2016.121), 2016-12-14

**Figure S1) Comparison of graphical genotypes of the IBS and IBD genotype matrices in HEB-25.**

a) IBS matrix of HEB-25, grouped by families and chromosomes, SNP order following Maurer *et al.* (2015),  
green = homozygous exotic genotype, grey = heterozygous genotype

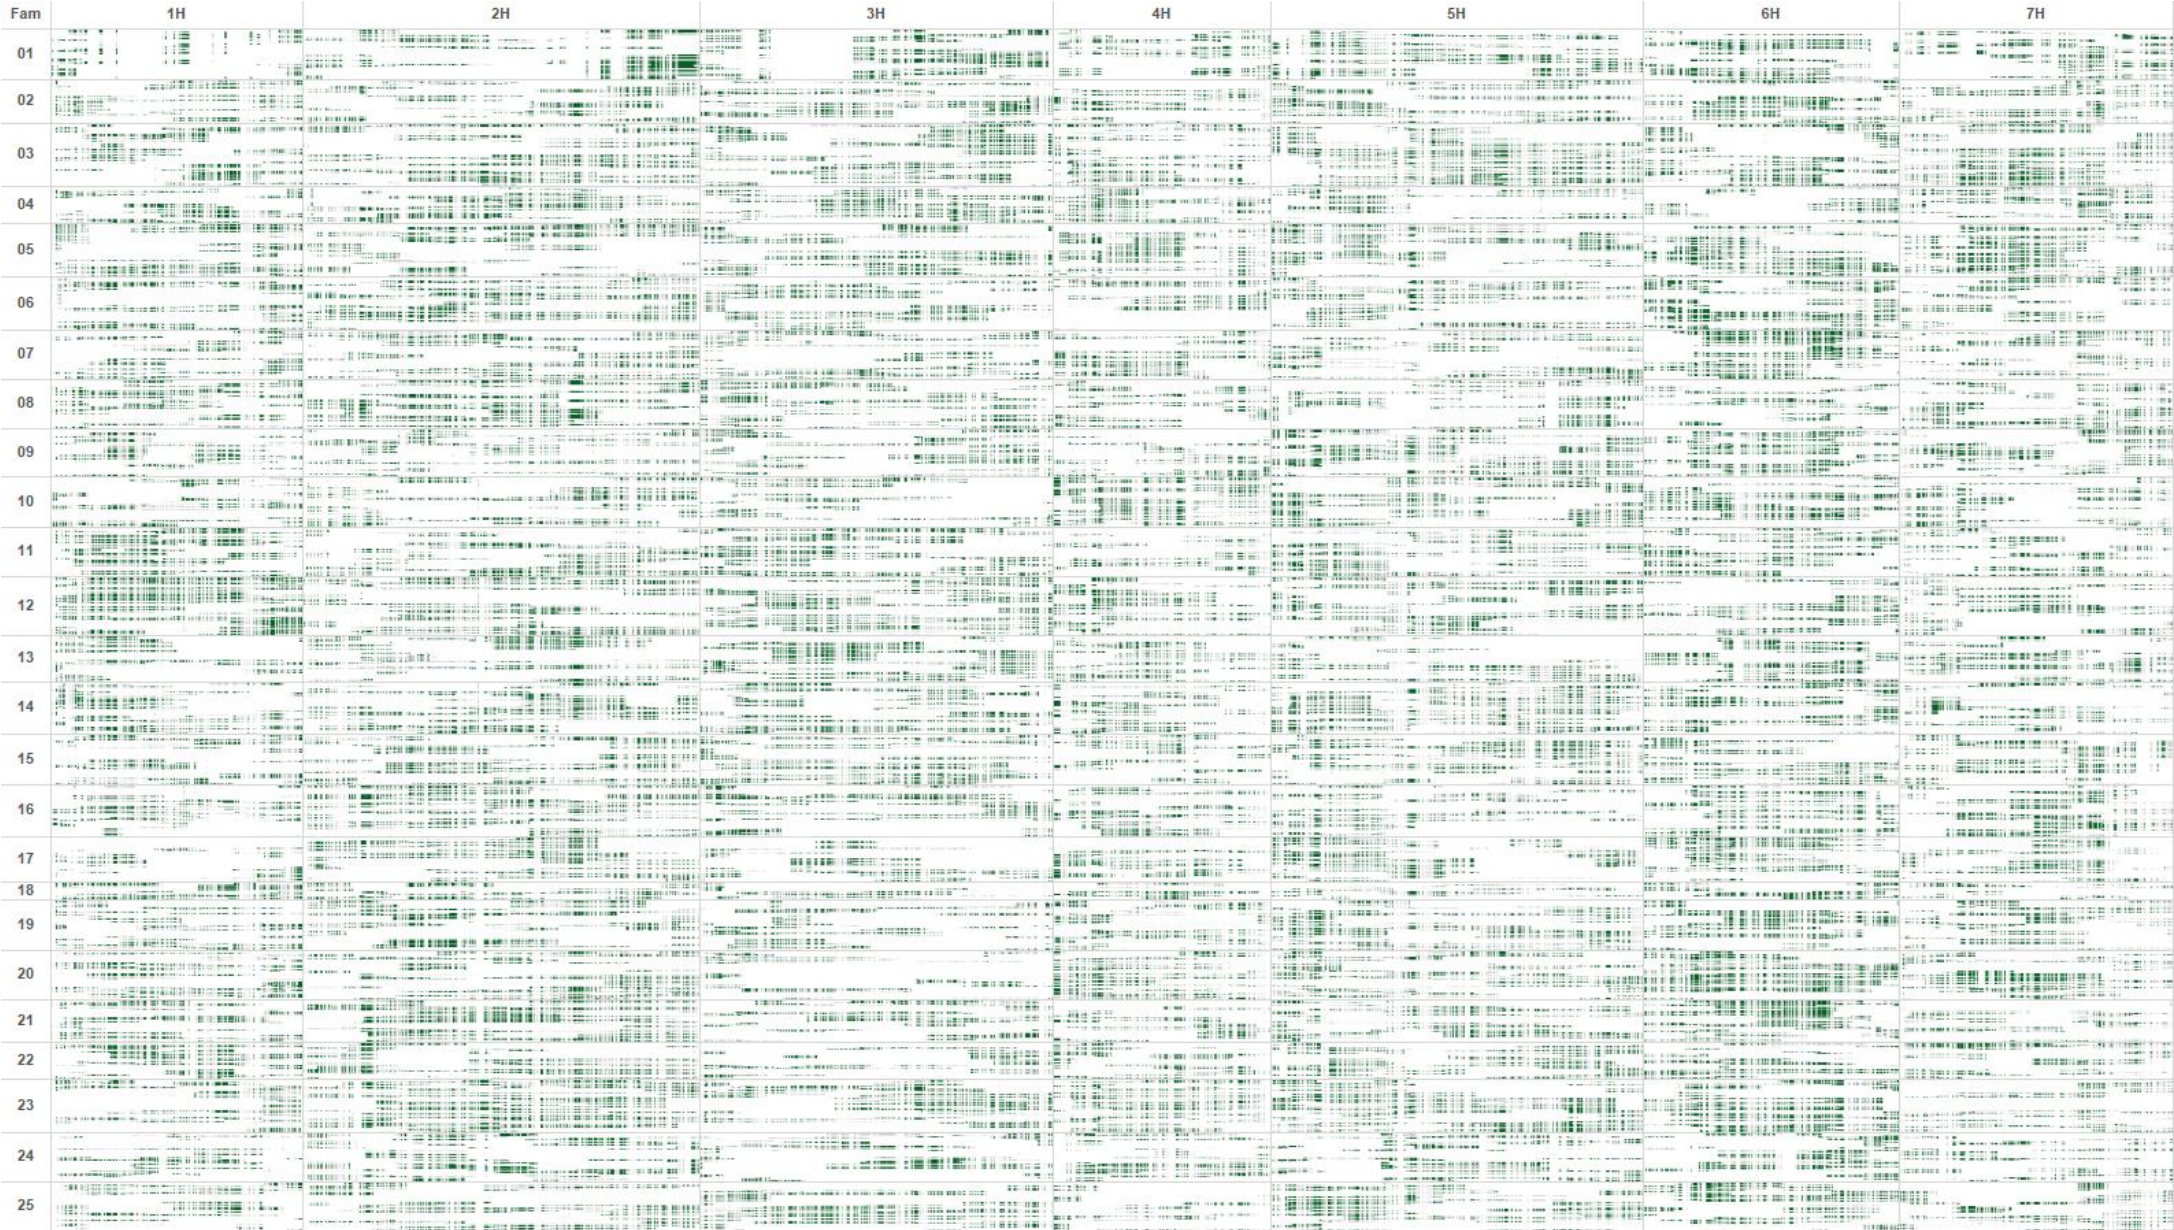



b) IBD matrix of HEB-25, grouped by families and chromosomes, SNP order following Maurer *et al.* (2015),  
green = homozygous exotic genotype, grey = heterozygous genotype

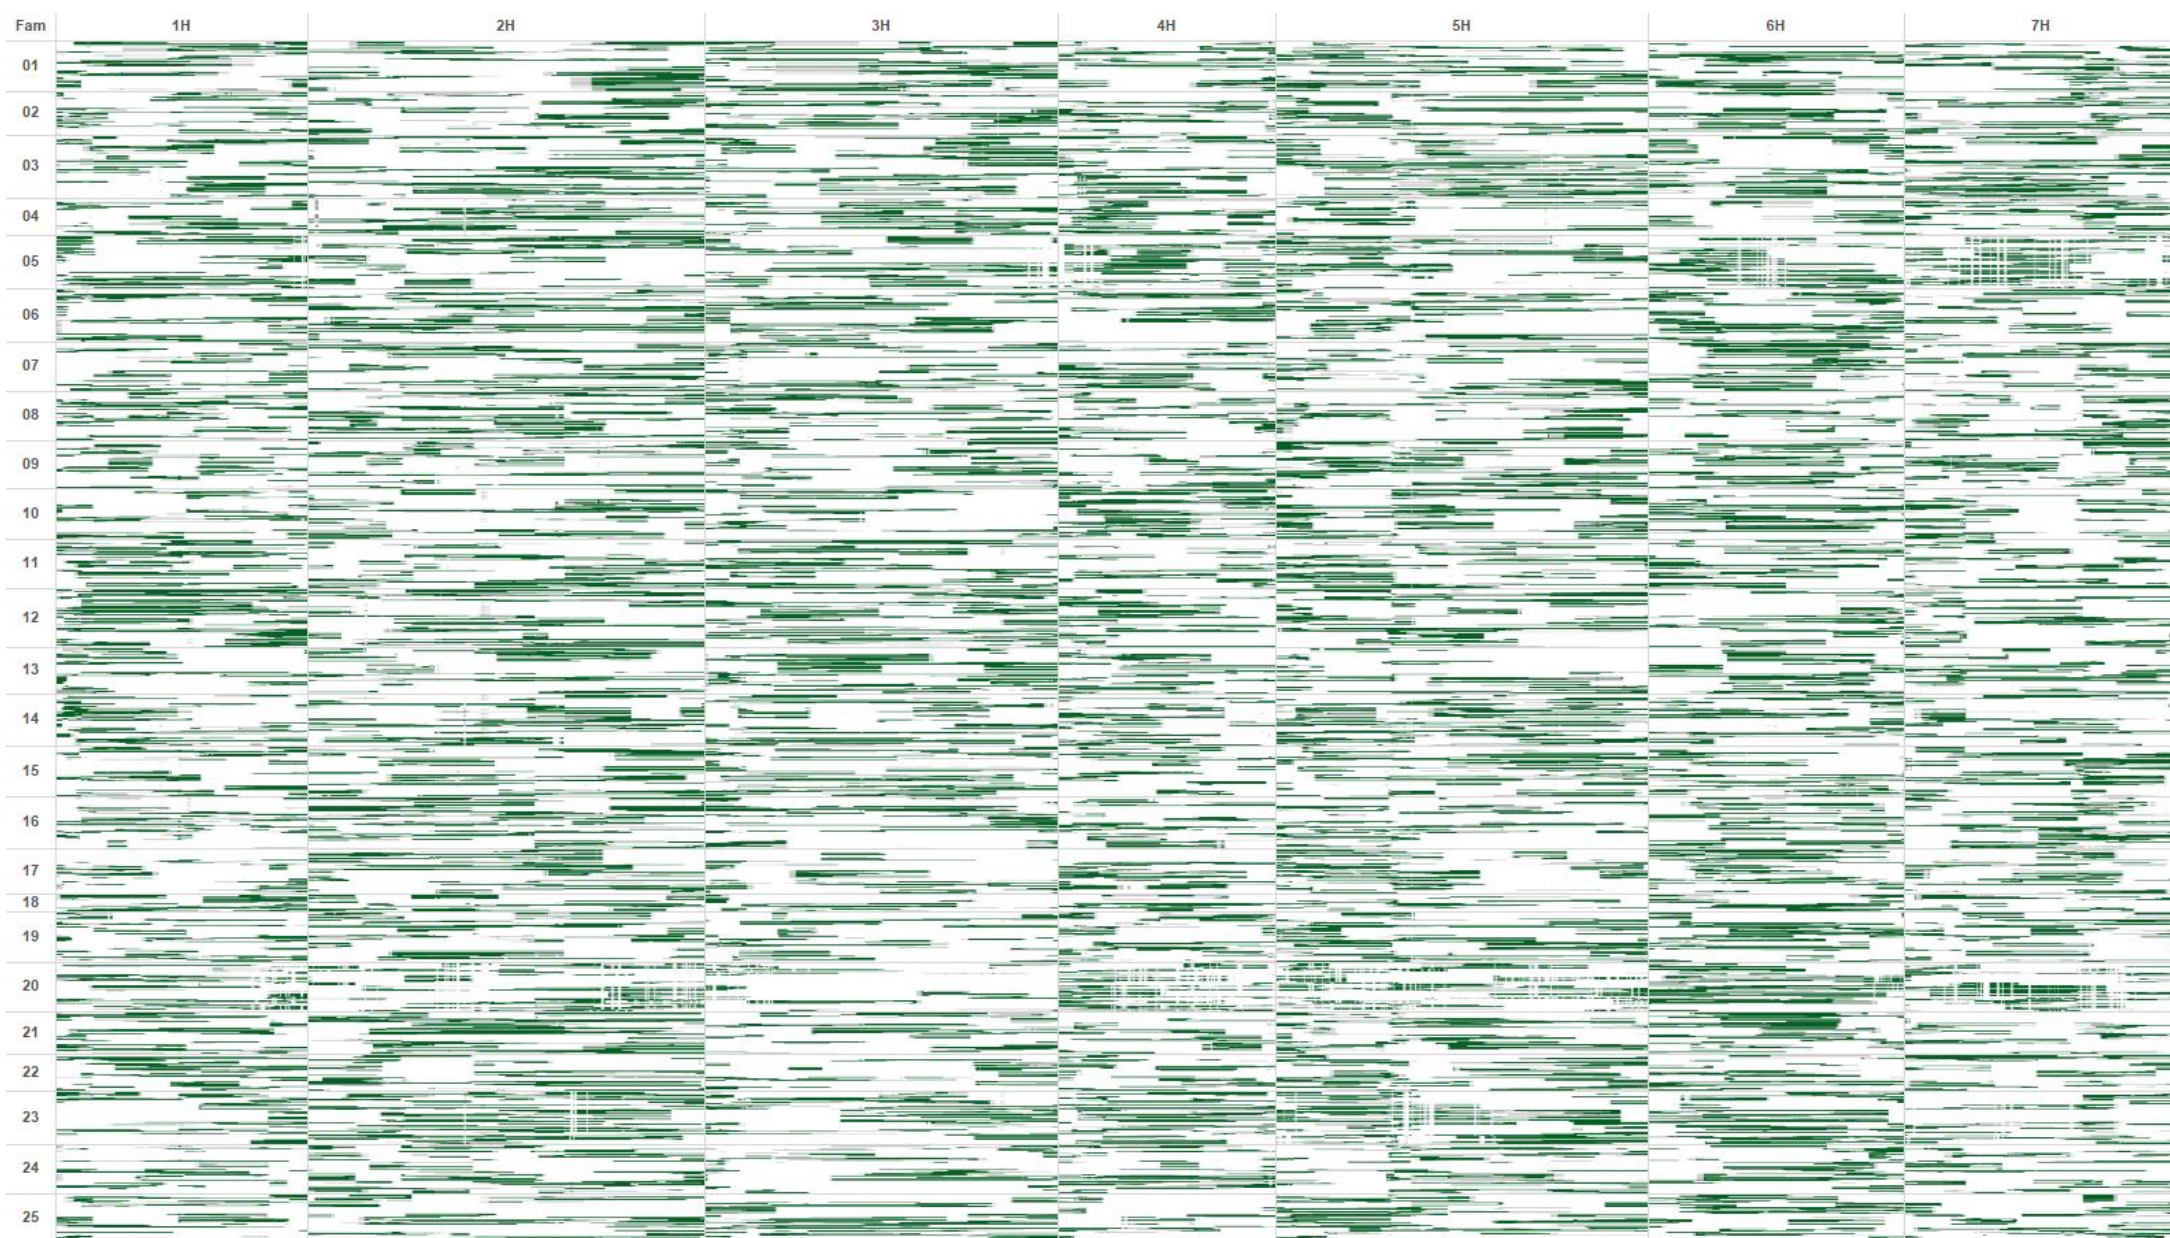

Supplement: hdy2016121x2.pdf [file hdy2016121x2.pdf]
