# Supplementary material for: Estimating parent-specific QTL effects through cumulating linked identity-by-state SNP effects in multiparental populations
Source: PubMed Central journal article supplement — Heredity (Edinb). 2016 Dec 14;118(5):477–85. doi: 10.1038/hdy.2016.121 (PMC5520528; doi:10.1038/hdy.2016.121), 2016-12-14
Supplement: hdy2016121x3.pdf [file hdy2016121x3.pdf]

## Figure S2)

# QTL effect estimation for each donor allele in HEB-25

### Basic pre-requisites and assumptions:

- Effect estimates from identity-by-state GWAS model 'IBS-M' (=Model-B, Liu et al. 2011)
- Significant markers reveal different segregation patterns across HEB donors
- Cumulation of nearby SNP effects accounts for donor-specific allelic QTL effects

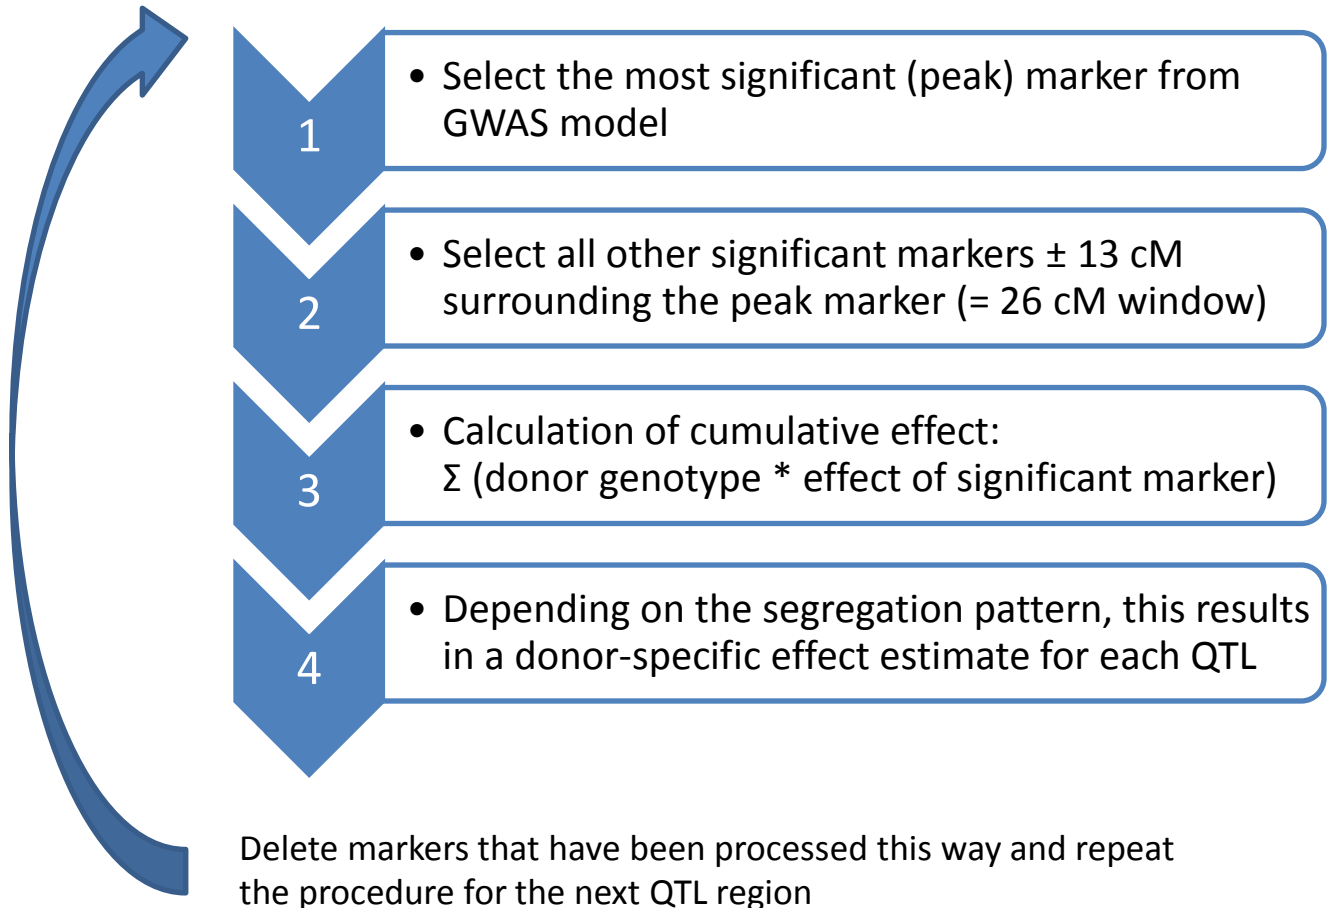

### Example

| ← 26 cM →   |                 |      |      |                      |                           |
|-------------|-----------------|------|------|----------------------|---------------------------|
| Marker      | SNP2            | SNP1 | SNP3 |                      |                           |
| GWAS effect | +2              | +5   | -1   |                      |                           |
|             | Donor genotypes |      |      | Cumulation           | Donor-specific QTL effect |
| Donor 1     | 0               | 2    | 2    | $0*2 + 2*5 + 2*(-1)$ | 8                         |
| Donor 2     | 0               | 2    | 0    | $0*2 + 2*5 + 0*(-1)$ | 10                        |
| Donor 3     | 0               | 0    | 2    | $0*2 + 0*5 + 2*(-1)$ | -2                        |
| Donor 4     | 2               | 2    | 2    | $2*2 + 2*5 + 2*(-1)$ | 12                        |
| Donor 5     | 0               | 0    | 0    | $0*2 + 0*5 + 0*(-1)$ | 0                         |
