# Supplementary material for: Estimating parent-specific QTL effects through cumulating linked identity-by-state SNP effects in multiparental populations
Source: PubMed Central journal article supplement — Heredity (Edinb). 2016 Dec 14;118(5):477–85. doi: 10.1038/hdy.2016.121 (PMC5520528; doi:10.1038/hdy.2016.121), 2016-12-14
Supplement: hdy2016121x5.pdf [file hdy2016121x5.pdf]

Figure S4) Detection rates of significant associations by model IBS-M and IBD-MxF.

A) 1 parent-specific QTL simulated

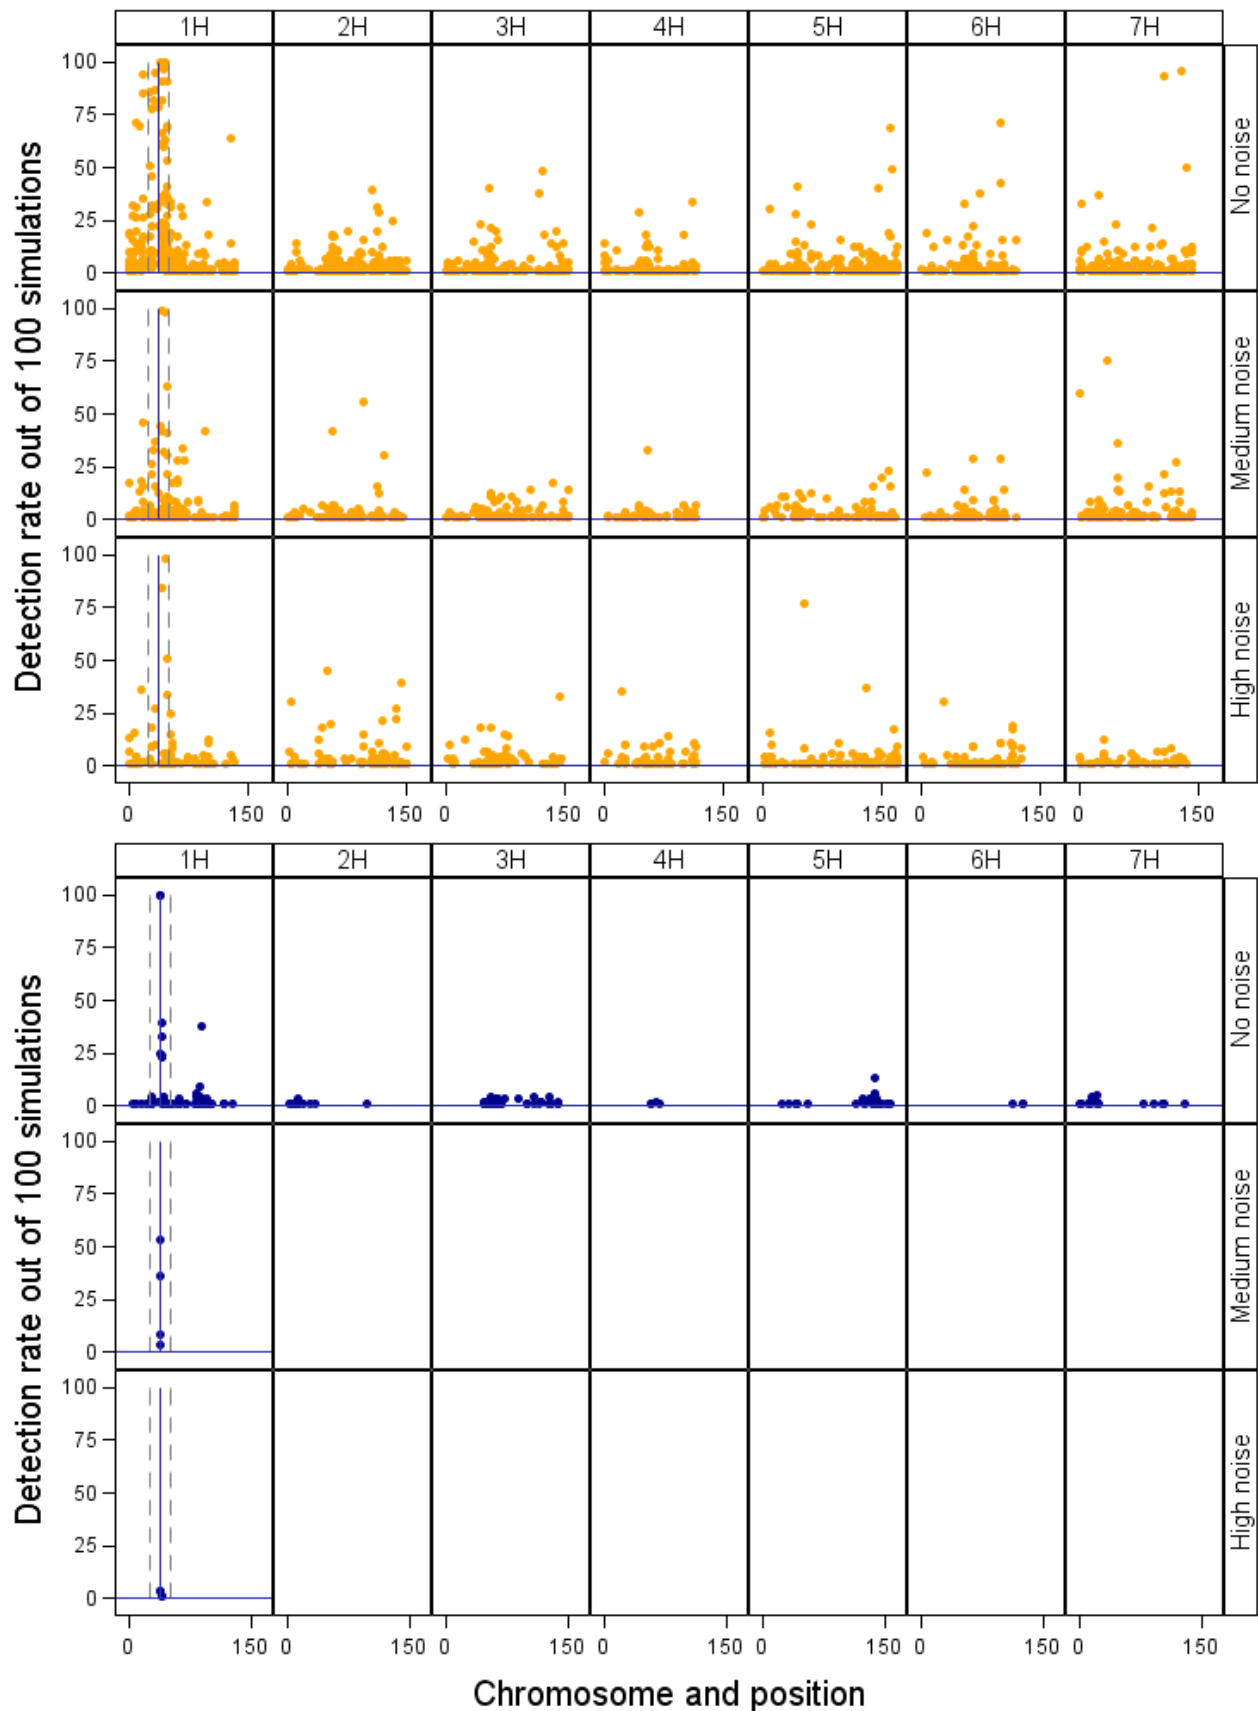

Orange dots represent IBS-M, blue dots IBD-MxF. The true position of the simulated QTL and the interval used for cumulating IBS-M SNP estimates are indicated by vertical lines. Three different simulated traits with increasing noise are shown.

### B) 3 parent-specific QTL simulated

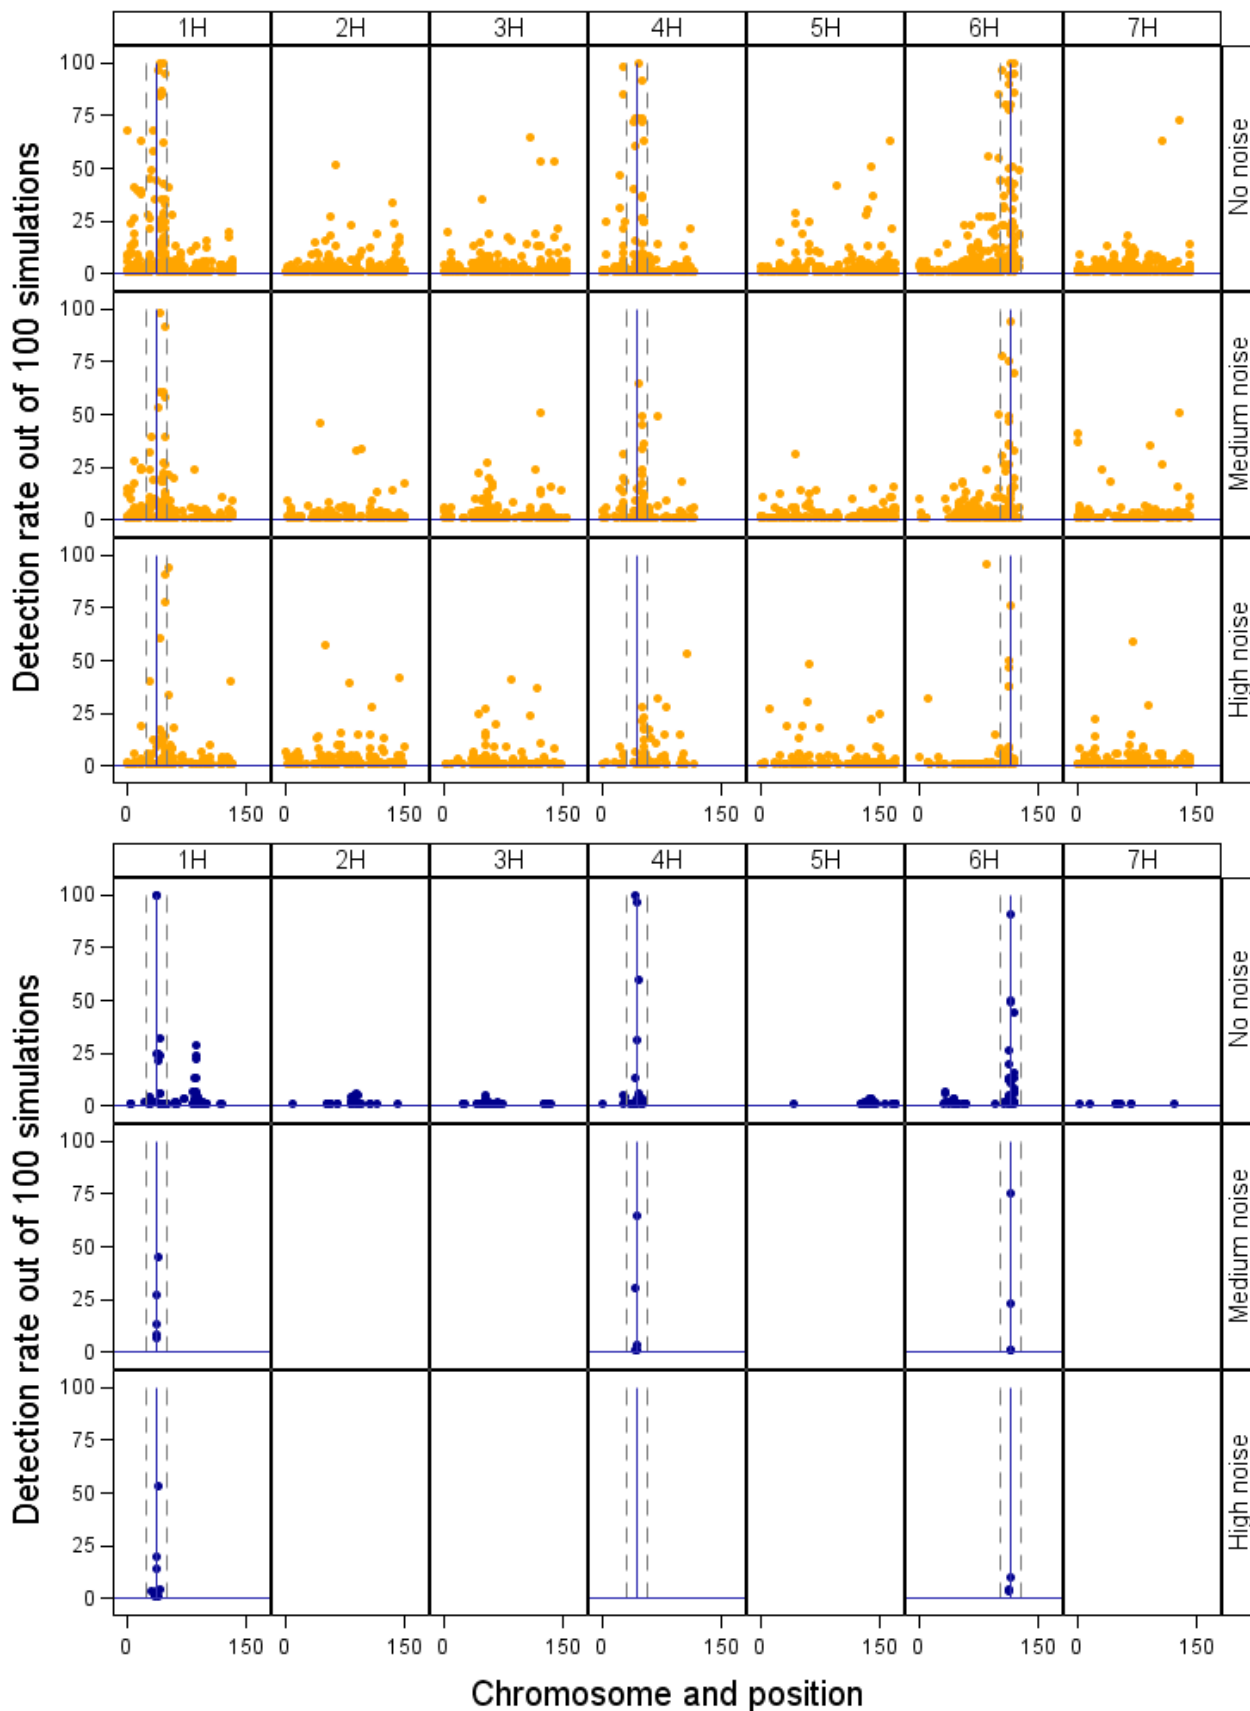

Orange dots represent IBS-M, blue dots IBD-MxF. The true position of the simulated QTL and the interval used for cumulating IBS-M SNP estimates are indicated by vertical lines. Three different simulated traits with increasing noise are shown.

### C) 8 parent-specific QTL simulated

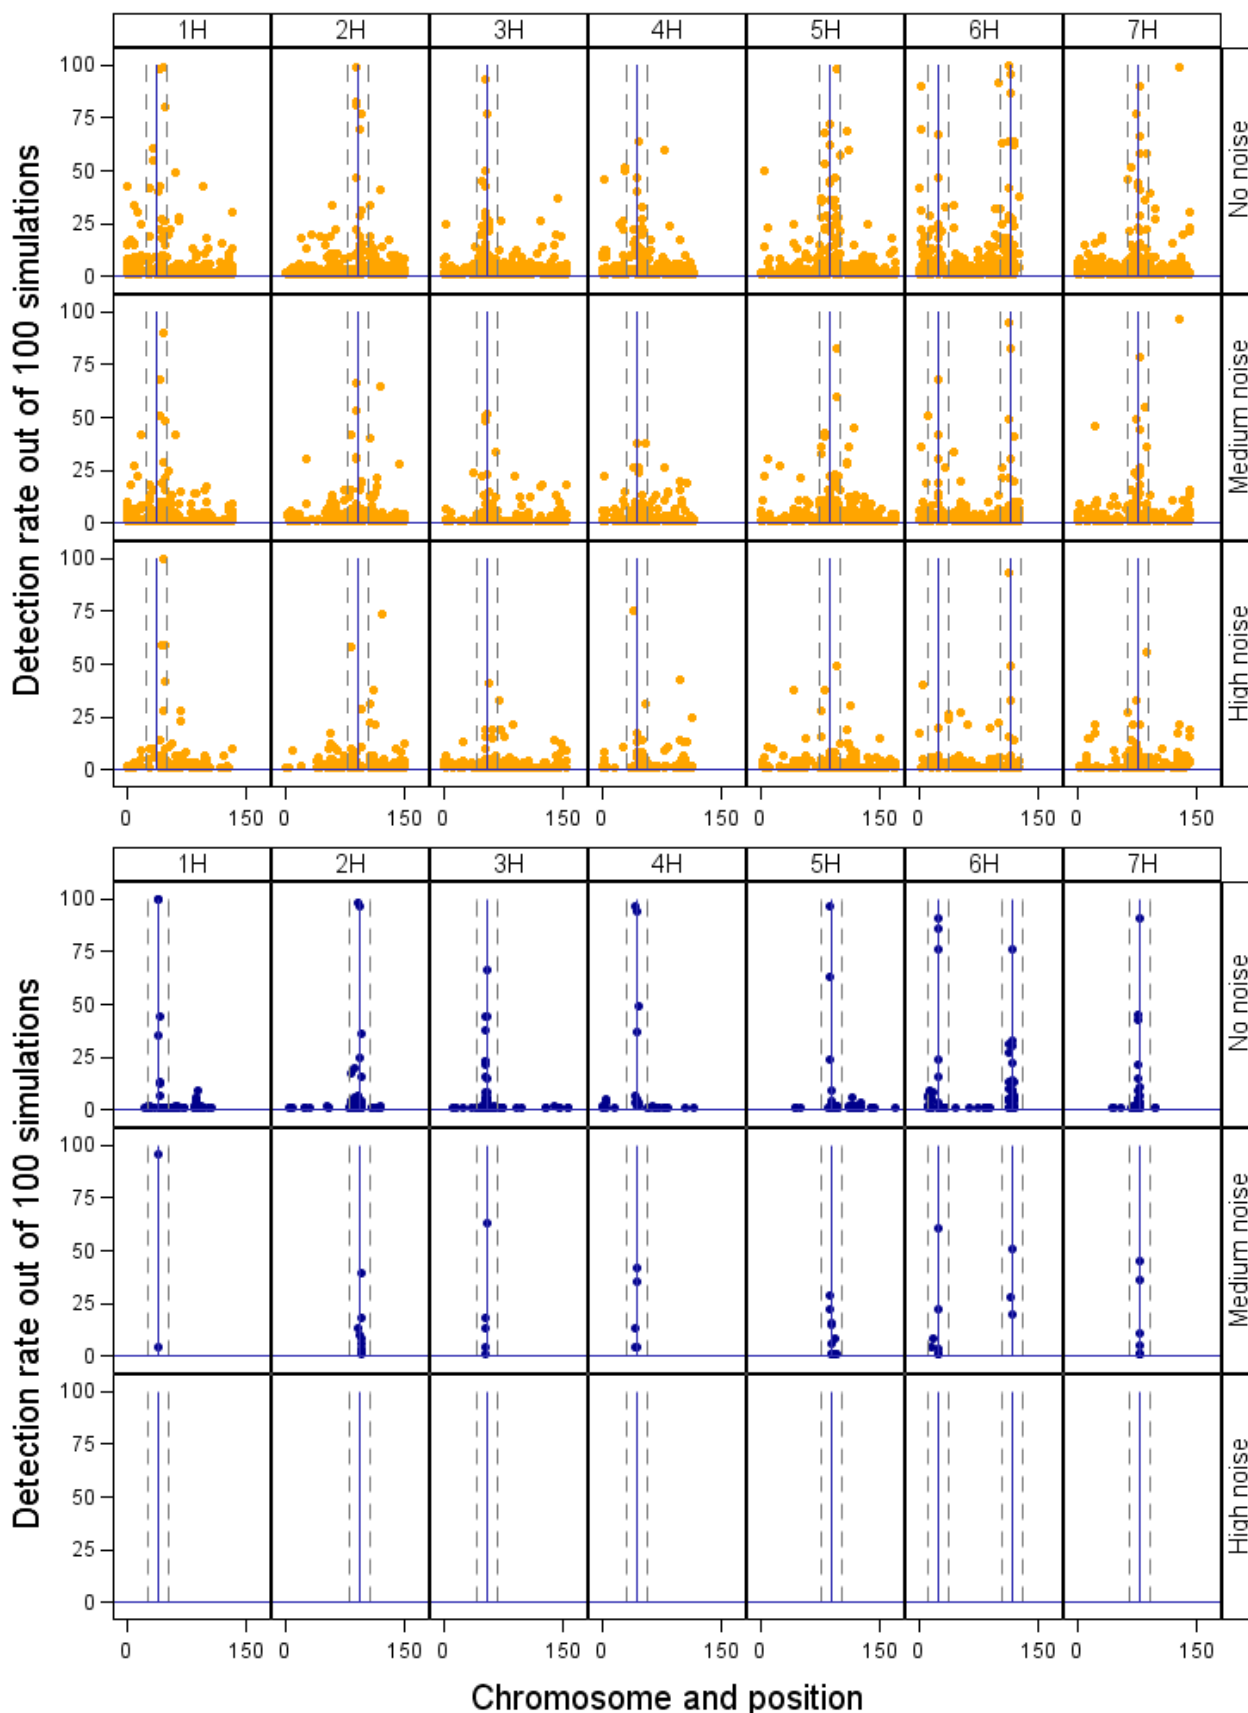

Orange dots represent IBS-M, blue dots IBD-MxF. The true position of the simulated QTL and the interval used for cumulating IBS-M SNP estimates are indicated by vertical lines. Three different simulated traits with increasing noise are shown.
